# Supplementary material for: Enhanced actuated strain of titanium dioxide/nitrile-butadiene rubber composite by the biomimetic method
Source: Royal Society of Chemistry journal article supplement (doi:10.1039/c5ra12311a), 2015-01-01
Supplement: c5ra12311a1.pdf [file c5ra12311a1.pdf]

## Supplementary Information

### **Enhanced actuated strain of titanium dioxide/nitrile-butadiene rubber composite by biomimetic method**

Dan Yang<sup>a,b</sup>, Shuo Huang<sup>b,c</sup>, Yibo Wu<sup>a,b</sup>, Mengnan Ruan<sup>b,c</sup>, Shuxin Li<sup>a,b</sup>, Yuwei

Shang<sup>a,b</sup>, Xiuguo Cui<sup>a</sup>, Yang Wang<sup>a</sup>, Wenli Guo<sup>a,b\*</sup>

<sup>a</sup>Department of Material Science and Engineering, Beijing Institute of Petrochemical  
Technology, Beijing, 102617, China.

<sup>b</sup>Beijing Key Lab of Special Elastomeric Composite Materials, Beijing, 102617,  
China

<sup>c</sup>Materials Science and Engineering, Beijing University of Chemical Technology,  
Beijing 100029, China

\*To whom correspondence should be addressed.

E-mail: [gwenli@bipt.edu.cn](mailto:gwenli@bipt.edu.cn)

**Table S1** Comparing actuated strain of 10 phr TiO<sub>2</sub>-PDA/NBR composite with other EAP actuators

| Material                                | Prestrain<br>(x,y) (%) | Actuated<br>strain <sup>a</sup><br>(%) | Field<br>Strength <sup>a</sup><br>(MV/m) | Ref. |
|-----------------------------------------|------------------------|----------------------------------------|------------------------------------------|------|
| VHB 4910                                | 540, 75                | 215                                    | 239                                      | 1    |
| VHB 4905                                | 300, 300               | 200                                    | 480                                      | 2    |
| Silicone ENP SEBS161 (5-30 wt%)         | 300, 300               | 180-30                                 | 32-133                                   | 3    |
| Silicone ENP SEBS 217(5-30 wt%)         | 300, 300               | 245-47                                 | 22-98                                    | 3    |
| VHB 4910 acrylic                        | 300, 300               | 158                                    | 412                                      | 1    |
| VHB4910/poly(1,6-hexanediol diacrylate) | 275, 275               | 233                                    | 300                                      | 4    |
| HS3                                     | 280, 0                 | 117                                    | 128                                      | 1    |
| Silicone-based prototype                | 200% <sup>b</sup>      | 18.31                                  | 96                                       | 5    |
| TiO <sub>2</sub> /SEBS                  | 100, 100               | 12                                     | 27.5                                     | 6    |
| PMMA-PnBA-PMMA                          | 100, 100               | 12                                     | 4.5                                      | 7    |
| Silicone+30 wt%TiO <sub>2</sub>         | 100, 100               | 11                                     | 10                                       | 8    |
| PDMS/PHT                                | 100, 100               | 7.6                                    | 8                                        | 9    |
| polyurethane-based prototype            | 100% <sup>b</sup>      | 2.04                                   | 127                                      | 5    |
| CF19-218                                | 100, 0                 | 63                                     | 181                                      | 1    |
| HS3 silicone                            | 68, 68                 | 93                                     | 110                                      | 1    |
| CF19-2186 silicone                      | 45, 45                 | 64                                     | 350                                      | 1    |
| DC 3481(5%81-R)/20 wt%CPO               | 40, 40                 | 11                                     | 27                                       | 10   |
| CF19-2186 silicone                      | 15, 15                 | 33                                     | 160                                      | 1    |
| VHB 4910 acrylic                        | 15, 15                 | 40                                     | 55                                       | 1    |

|                                  |        |                  |      |    |
|----------------------------------|--------|------------------|------|----|
| HS3 silicone                     | 14, 14 | 69               | 72   | 1  |
| Allyl-cyano/SiR                  | 10, 10 | 7                | 20   | 11 |
| TiO <sub>2</sub> /PDMS           | 5, 5   | 18               | 50   | 12 |
| DOP/HNBR                         | 0, 0   | 22               | 30   | 13 |
| Dipole/PDMS                      | 0, 0   | 14.8             | 1.3  | 14 |
| TiO <sub>2</sub> /PDMS/DMSO      | 0, 0   | 13               | 30   | 15 |
| PANI@PDVB/PDMS                   | 0, 0   | 12               | 54   | 16 |
| PEG/PDMS                         | 0, 0   | 11.5             | 40   | 17 |
| BaTiO <sub>3</sub> /CB/PDMS      | 0, 0   | 7.46             | 30   | 18 |
| PANI-g-PolyCuPc-g-PU             | 0, 0   | 7                | 23   | 19 |
| 23 wt%PANI/P(VDF-TrFE-CTFE)      | 0, 0   | 1.5 <sup>c</sup> | 9.5  | 20 |
| 14PANI/15PolyCuPc/85PU           | 0, 0   | 9.3 <sup>c</sup> | 20   | 21 |
| SEBS-MA grafted PANI             | 0, 0   | 1.4              | 27   | 22 |
| NBR/TiO <sub>2</sub> /DOP        | 0, 0   | 3.04             | 20   | 23 |
| 18.26% v/v graphite/Polyurethane | 0, 0   | 0.037            | 0.75 | 24 |
| 5 wt% CNTs/PDMS                  | 0, 0   | 4.4              | 1.5  | 25 |
| P(VDF-TrFE)/40 wt%CuPc           | 0, 0   | 1.91             | 13   | 26 |
| Silicone oil/PMN/PDMS            | 0, 0   | 7.4              | 40   | 27 |
| CNT/P(VDF-TrFE-CFE)              | 0, 0   | 2.5              | 72   | 28 |
| P(VDF-TrFE-CFE)                  | 0, 0   | 4.5              | 130  | 29 |
| LC gels                          | 0, 0   | 2.1              | 25   | 30 |
| Polyester elastomer              | 0, 0   | 11.9             | 15.6 | 31 |
| 50 phr BT-PDA/HNBR               | 0, 0   | 20               | 45   | 32 |
| m-BT/SR4                         | 0, 0   | 26               | 12   | 33 |

|                                  |      |                 |      |    |
|----------------------------------|------|-----------------|------|----|
| TiO <sub>2</sub> /PDMS/MDSO      | 0, 0 | 13              | 30   | 34 |
| DAN/TPU                          | 0, 0 | 2.6             | 20   | 35 |
| SeRM                             | 0, 0 | 10              | 23   | 36 |
| Azo-g-PDMS                       | 0, 0 | 17              | 67.5 | 37 |
| Carbon black/PU                  | 0, 0 | 18 <sup>c</sup> | 20   | 38 |
| SiC@C-PU                         | 0, 0 | 18 <sup>c</sup> | 18   | 39 |
| PBDII                            | 0, 0 | 25.5            | 42   | 40 |
| TRG/TPU                          | 0, 0 | 1.8             | 0.25 | 41 |
| TiO <sub>2</sub> /ESO/HNBR       | 0, 0 | 13.6            | 30   | 42 |
| 10 phr TiO <sub>2</sub> -PDA/NBR | 0, 0 | 5.2             | 12.5 |    |

<sup>a</sup>Estimated from graphical data in cited reference, when there is no tabular was provided; <sup>b</sup>The axial prestrain; <sup>c</sup>The longitudinal strain.

As getting a high actuated strain under the condition of prestrain-free is a big object for researchers, we compared the actuated strain of 10 phr TiO<sub>2</sub>-PDA/NBR composite with those of other dielectric elastomers reported in the literature under the condition of prestrain-free. It can be easily observed that the actuated strain (5.2%) of 10 phr TiO<sub>2</sub>-PDA/NBR composite is relatively high, showing an obvious advantage in practical application.

## Reference

- [1] R. Pelrine, R. Kornbluh, Q. Pei, and J. Joseph, *Science*, 2000, **287**, 836-839.
- [2] R. Palakodeti, and M. Kessler, *Mater. Lett.*, 2006, **60**, 3437-3440.
- [3] R. Shankar, T. K. Ghosh, and R. J. Spontak, *Adv. Mater.*, 2007, **19**, 2218-2223.
- [4] S. M. Ha, W. Yuan, Q. Pei, R. Pelrine, and S. Stanford, *Adv. Mater.*, 2006, **18**,

887-891.

- [5] S. Arora, T. Ghosh, and J. Muth, *Sens. Actuator, A*, 2007, **136**, 321-328.
- [6] H. Stoyanov, M. Kolloosche, S. Risse, D. N. McCarthy, and G. Kofod, *Soft Matter*, 2011, **7**, 194-202.
- [7] Y. Jang, and T. Hirai, *Soft Matter*, 2011, **7**, 10818-10823.
- [8] F. Carpi, and D. D. Rossi, *IEEE Trans. Dielectr. Electr. Insul.*, 2005, **12**, 835-843.
- [9] F. Carpi, G. Gallone, F. Galantini, and D. D. Rossi, *Adv. Funct. Mater.*, 2008, **18**, 235-241.
- [10] C. Löwe, X. Zhang, and G. Kovacs, *Adv. Eng. Mater.*, 2005, **7**, 361-367.
- [11] S. Risse, B. Kussmaul, H. Krüger, and G. Kofod, *Adv. Funct. Mater.*, 2012, **22**, 3958-3692.
- [12] H. Liu, L. Zhang, D. Yang, Y. Yu, L. Yao, and M. Tian, *Soft Mater.*, 2013, **11**, 363-370.
- [13] D. Yang, M. Tian, Y. C. Dong, H. L. Liu, Y. C. Yu, and L. Q. Zhang, *Smart Mater. Struct.*, 2012, **21**, 035017.
- [14] B. Kussmaul, S. Risse, G. Kofod, R. Waché, M. Wegener, D. N. McCarthy, H. Krüger, and R. Gerhard, *Adv. Funct. Mater.*, 2011, **21**, 4589-4594.
- [15] H. Zhao, D. R. Wang, J. W. Zha, J. Zhao, and Z. M. Dang, *J. Mater. Chem. A*, 2013, **1**, 3140-3145.
- [16] M. Molberg, D. Crespy, P. Rupper, F. Nüesch, J. A. E. Månson, C. Löwe, and D. M. Opris, *Adv. Funct. Mater.*, 2010, **20**, 3280-3291.
- [17] H. Liu, L. Zhang, D. Yang, N. Ning, Y. Yu, L. Yao, B. Yan, and M. Tian, *J.*

- Phys. D: Appl. Phys.*, 2012, **45**, 485303.
- [18] H. Zhao, Y. J. Xia, Z. M. Dang, J. W. Zha, and G. H. Hu, *J. Appl. Polym. Sci.*, 2013, **127**, 4440-4445.
- [19] C. Huang, and Q. M. Zhang, *Adv. Mater.*, 2005, **17**, 1153-1158.
- [20] C. Huang, and Q. M. Zhang, *Adv. Funct. Mater.*, 2004, **14**, 501-506.
- [21] C. Huang, Q. Zhang, and K. Bhattacharya, *Appl. Phys. Lett.*, 2004, **84**, 4391.
- [22] H. Stoyanov, M. Kollosche, D. N. McCarthy, and G. Kofod, *J. Mater. Chem.*, 2010, **20**, 7558-7564.
- [23] H. C. Nguyen, V. T. Doan, J. K. Park, J. C. Koo, Y. Lee, J. D. Nam, and H. R. Choi, *Smart Mater. Struct.*, 2009, **18**, 015006.
- [24] C. G. Cameron, R. S. Underhill, M. Rawji, and J. P. Szabo, *Proc. of SPIE.*, 2004, **5385**, 51-59.
- [25] L. Z. Chen, C. H. Liu, C. H. Hu, and S. S. Fan, *Appl. Phys. Lett.*, 2008, **92**, 263104.
- [26] Q. M. Zhang, H. Li, M. Poh, F. Xia, Z. Y. Cheng, H. Xu, and C. Huang, *Nature*, 2002, **419**, 284-287.
- [27] D. Yang, L. Zhang, H. Liu, Y. Dong, Y. Yu, and M. Tian, *J. Appl. Polym. Sci.*, 2012, **125**, 2196-2201.
- [28] S. Zhang, N. Zhang, C. Huang, K. Ren, and Q. Zhang, *Adv. Mater.*, 2005, **17**, 1897-1901.
- [29] F. Xia, Z. Y. Cheng, H. Xu, H. Li, Q. Zhang, G. J. Kavarnos, R. Y. Ting, G. Abdul-Sadek, and K. D. Belfield, *Adv. Mater.*, 2002, **14**, 1574-1477.

- [30] C. Huang, Q. Zhang, and A. Jakli, *Adv. Funct. Mater.*, 2003, **13**, 525-529.
- [31] D. Yang, M. Tian, Y. C. Dong, H. L. Liu, Y. C. Yu, and L. Q. Zhang, *Mater. Lett.*, 2012, **76**, 229-232.
- [32] D. Yang, M. Tian, D. Li, W. Wang, F. Ge, and L. Zhang, *J. Mater. Chem. A*, 2013, **1**, 12276-12284.
- [33] D. Yang, F. Ge, M. Tian, N. Ning, L. Zhang, C. Zhao, K. Ito, T. Nishi, H. Wang and Y. Luan, *J. Mater. Chem. A*, 2015, **3**, 9468-9479.
- [34] H. Zhao, D. R. Wang, J. W. Zha, J. Zhao, and Z. M. Dang, *J. Mater. Chem. A*, 2013, **1**:3140-3145.
- [35] N. Ning, B. Yan, S. Liu, Y. Yao, L. Zhang, T. W. Chan, T. Nishi and M. Tian, *Smart Mater. Struct.*, 2015, **24**, 032002.
- [36] S. Tsuchitani, T. Sunahara and H. Miki, *Smart Mater. Struct.*, 2015, **24**, 060530.
- [37] L. Zhang, D. Wang, P. Hu, J. W. Zha, F. You, S. T. Li and Z. M. Dang, *J. Mater. Chem. C*, 2015, **3**, 4883-4889.
- [38] B. Guiffard, L. Seveyrat, G. Sebald and D. Guyomar, *J. Phys. D: Appl. Phys.*, 2006, **39**, 3053-3057.
- [39] B. Guiffard, D. Guyomar, L. Seveyrat, Y. Chowanek, M. Bechelany, D. Cornu and P. Miele, *J. Phys. D: Appl. Phys.*, 2009, **42**, 055503.
- [40] W. Lei, R. Wang, D. Yang, G. Hou, X. Zhou, H. Qiao, W. Wang, M. Tian and L. Zhang, *RSC Adv.*, 2015, **5**, 47429-47438.
- [41] S. Liu, M. Tian, B. Yan, Y. Yao, L. Zhang, T. Nishi, and N. Ning, *Polymer*, 2015, **56**, 375-384

[42] D. Yang, L. Zhang, N. Ning, D. Li, Z. Wang, T. Nishi, K. Ito, and M. Tian, *RSC Adv.*, 2013, **3**, 21896-21904.
